# Supplementary material for: Differential Composition of Vaginal Microbiome, but Not of Seminal Microbiome, Is Associated With Successful Intrauterine Insemination in Couples With Idiopathic Infertility: A Prospective Observational Study
Source: PubMed Central journal article supplement — Open Forum Infect Dis. 2019 Dec 10;7(1):ofz525. doi: 10.1093/ofid/ofz525 (PMC6942492; doi:10.1093/ofid/ofz525), 2019-12-10
Supplement: ofz525_suppl_supplementary_material.pdf [file ofz525_suppl_supplementary_material.pdf]

**Figure S1.** Real-time PCR quantification of bacterial 16S gene copies in vaginal (A) and seminal (B) samples.  $\Delta Rn$  is plotted against PCR cycle number.

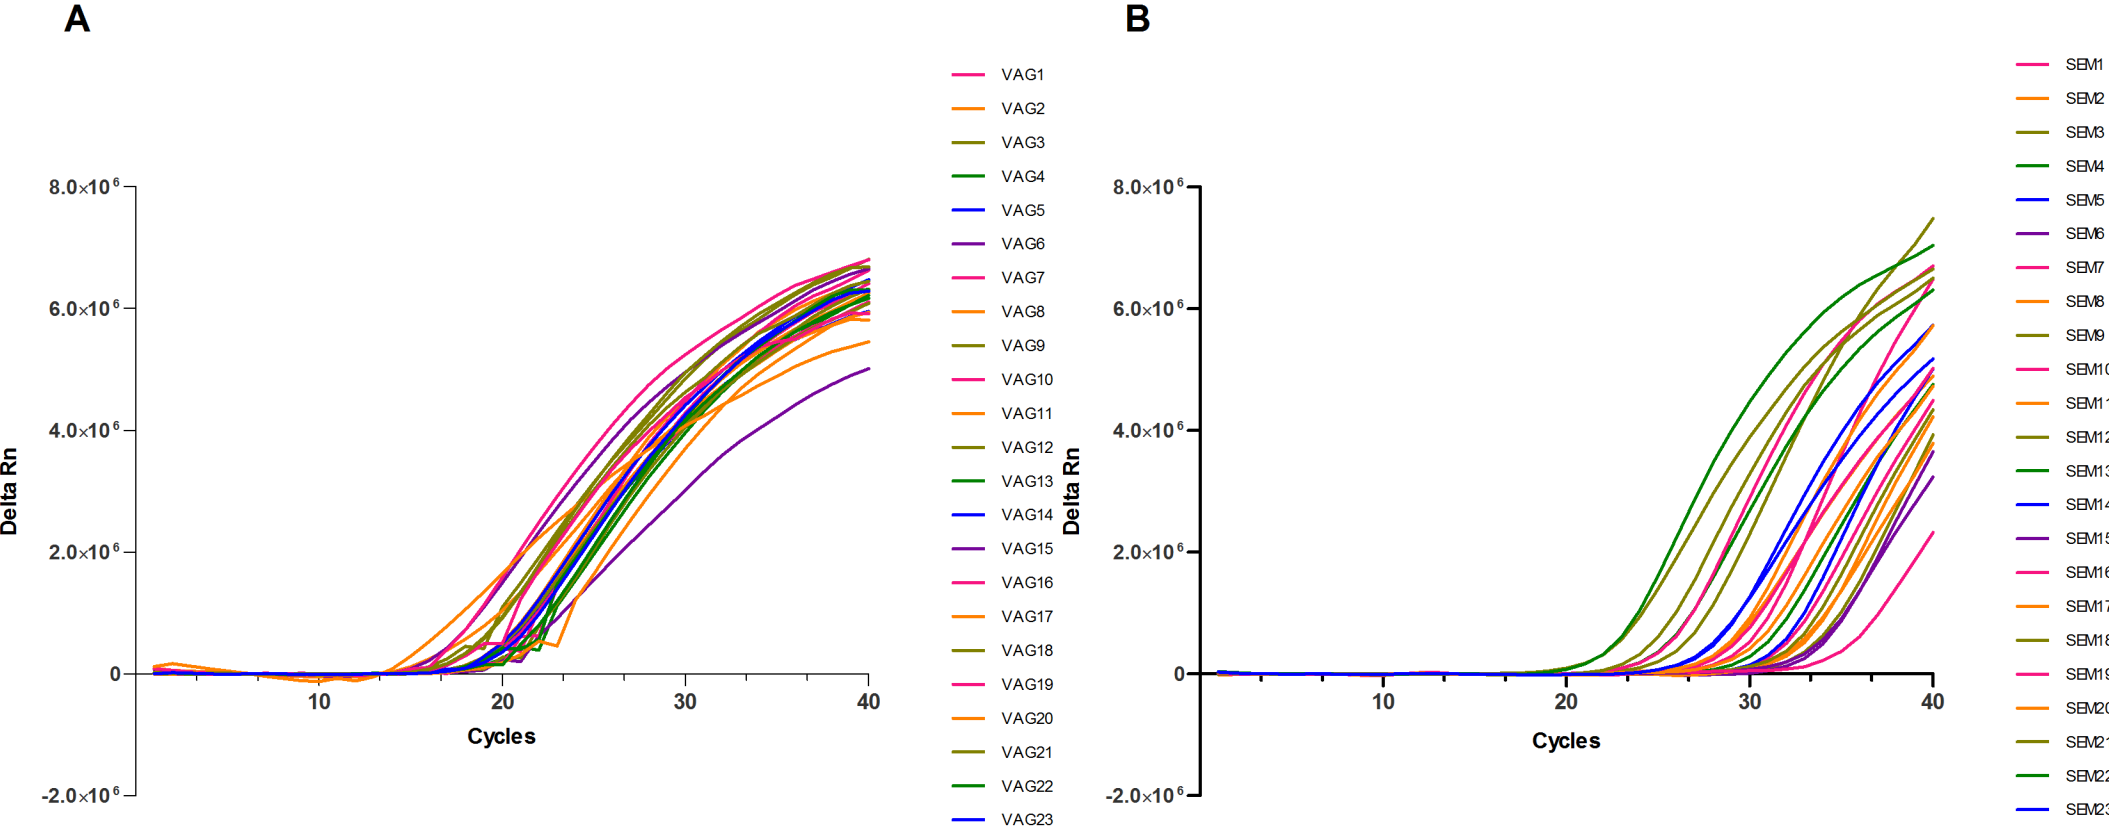

**Figure S2.** Vaginal microbiome composition at family level for the 23 women with idiopathic infertility.

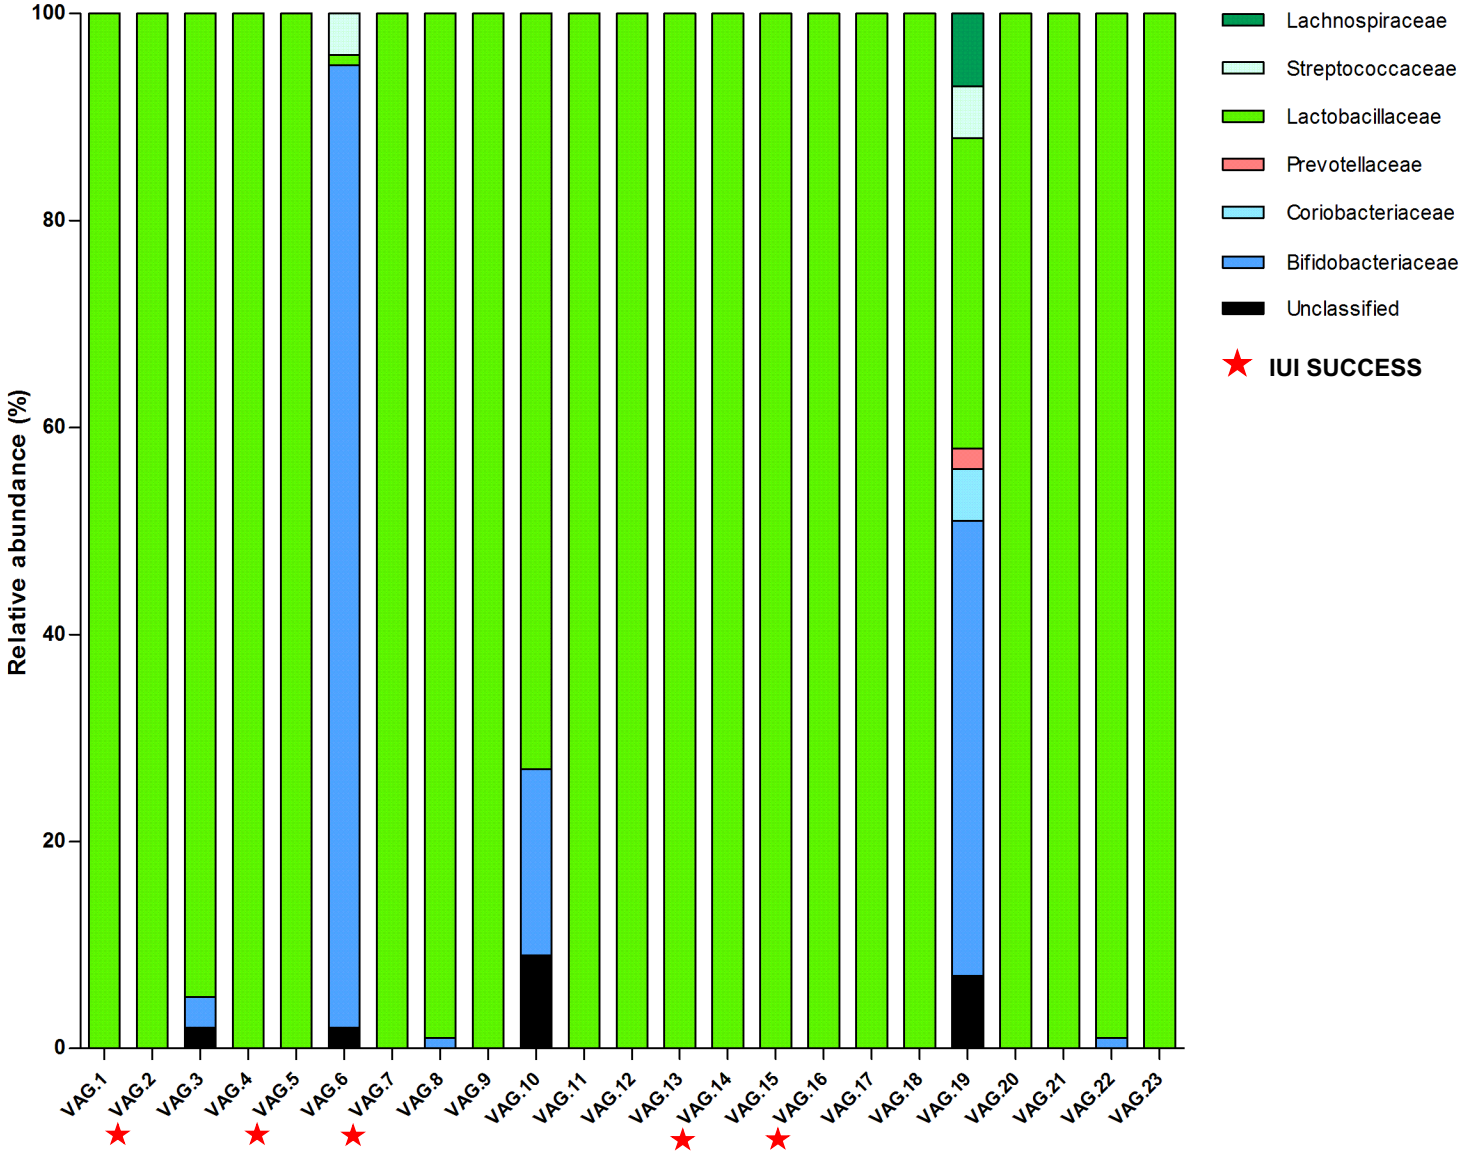

**Figure S3.** Shannon diversity rarefaction curves for the cohort of women (A) and men (B) with idiopathic infertility (IUI success, no IUI success) and controls.

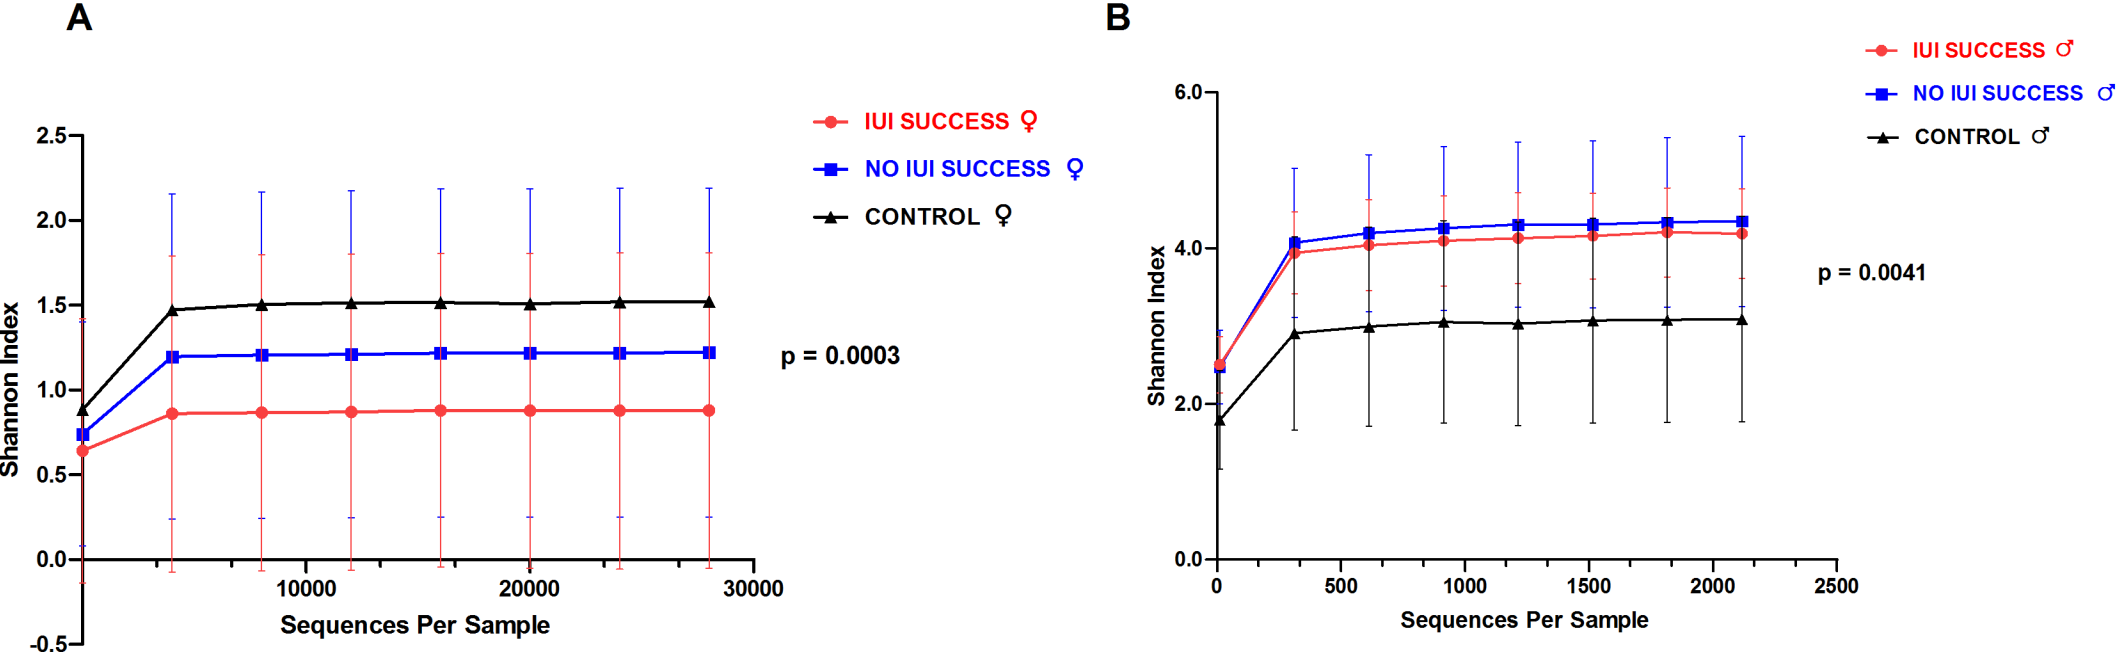

**Figure S4.** Seminal microbiome composition at family level for the 23 men with idiopathic infertility.

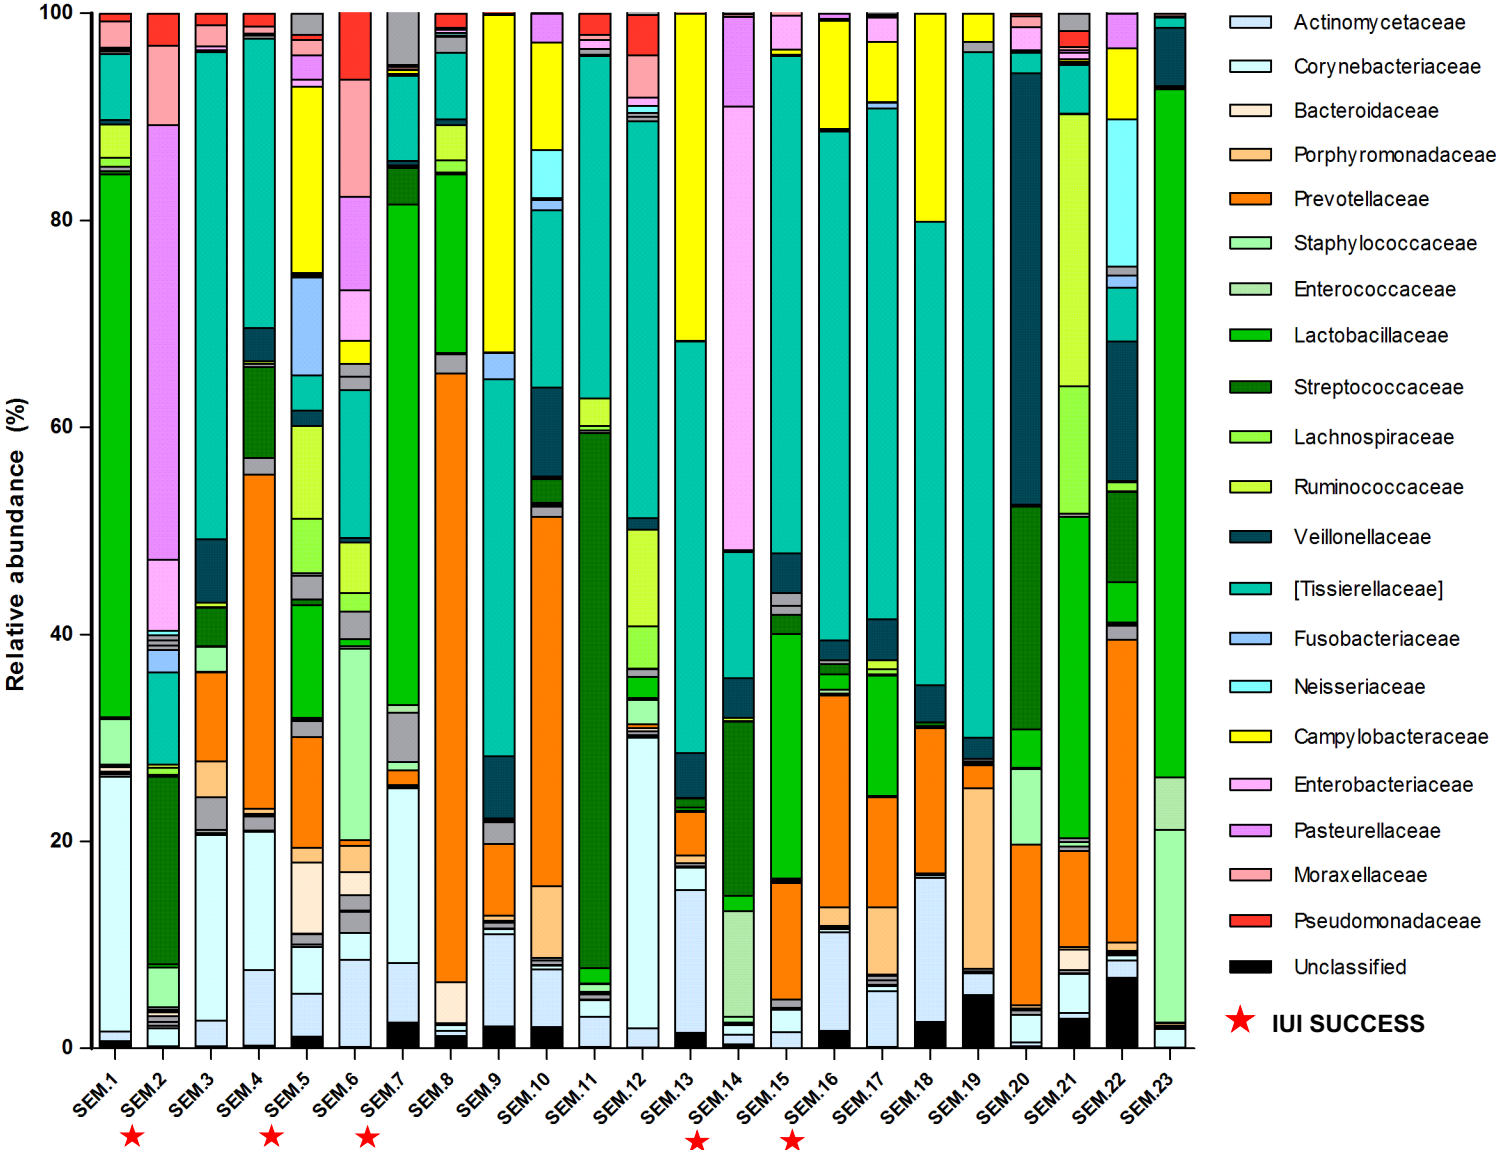

**Figure S5.** Heatmap of the relative abundance of *Lactobacillus* species found in the seminal microbiome of 23 men with idiopathic infertility.

Color key is indicated in the upper left corner. The red star indicates IUI success.

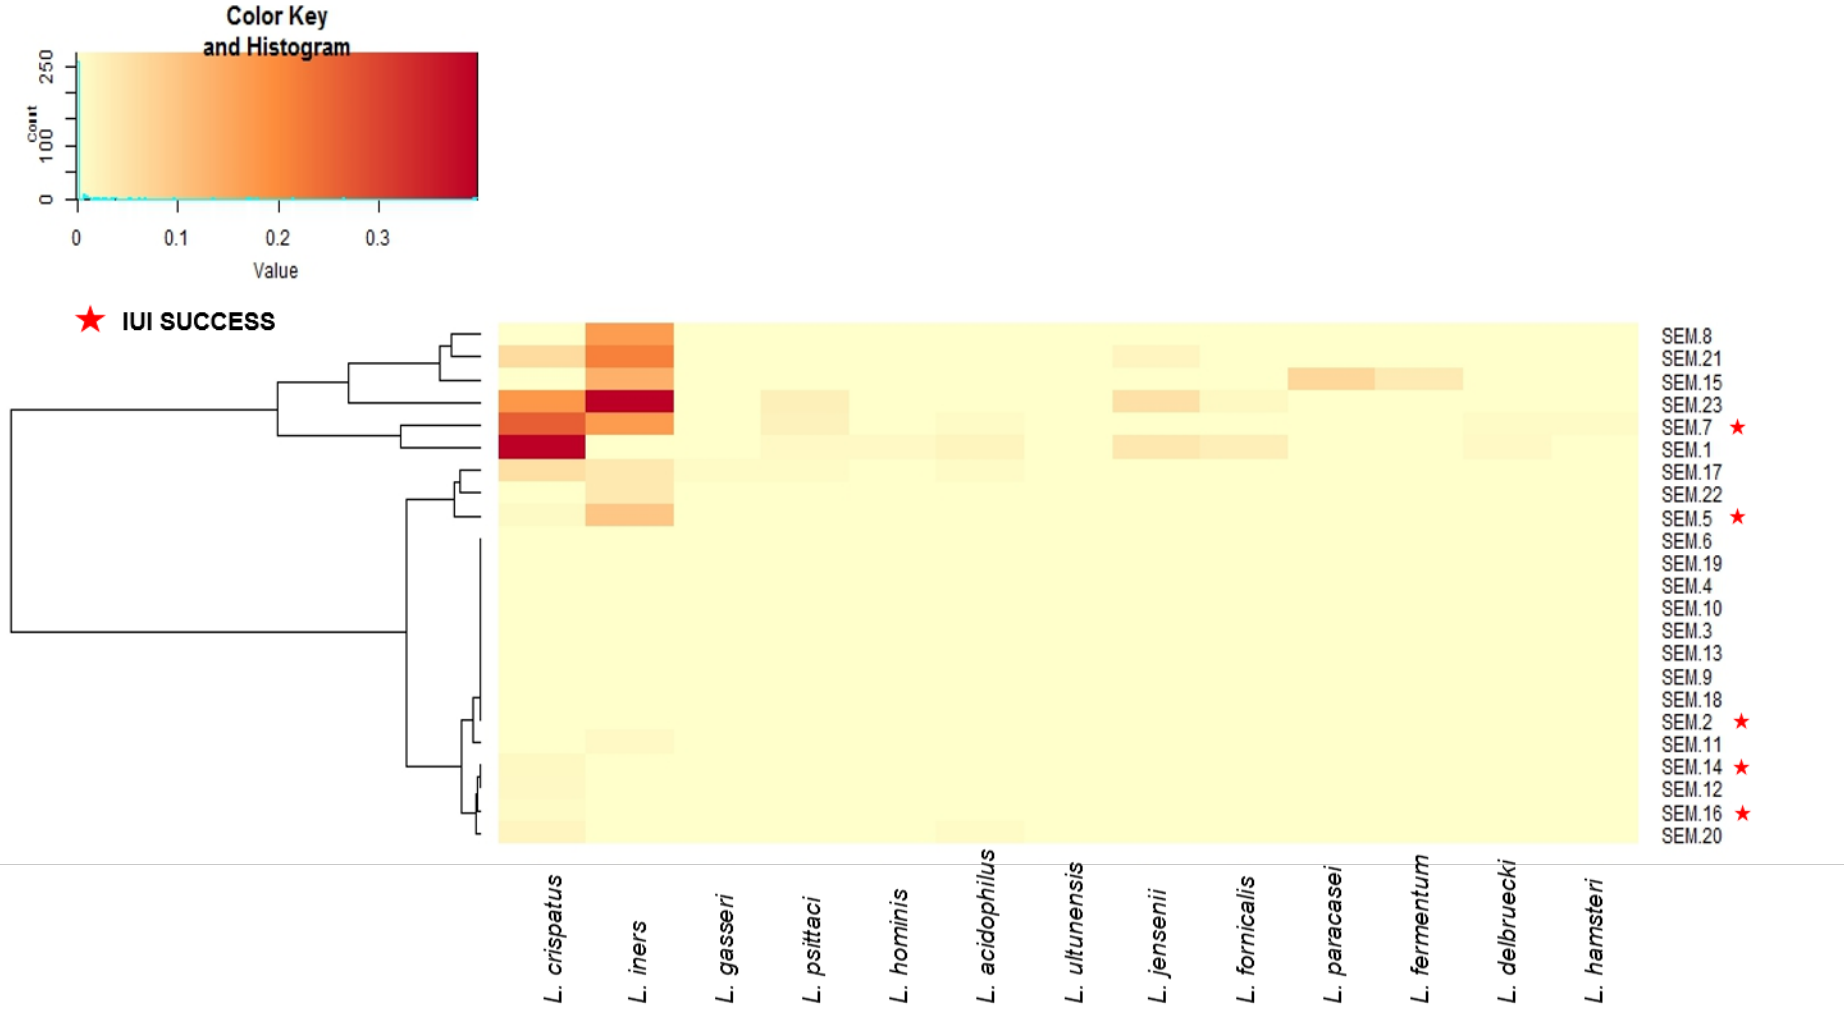

**Table S1.** Real-time PCR quantification of bacterial 16S gene copies in vaginal and seminal samples. Standard curve values are reported as well.

| Sample ID | Ct    | Ct (mean) | 16S Copies | ng/uL total DNA |
|-----------|-------|-----------|------------|-----------------|
| VAG1      | 18,17 | 18,465    | 5,08E+11   | 5,2             |
|           | 18,76 |           |            |                 |
| VAG2      | 18,77 | 18,755    | 4,09E+11   | 7,5             |
|           | 18,74 |           |            |                 |
| VAG3      | 16,61 | 16,655    | 1,97E+12   | 1,5             |
|           | 16,7  |           |            |                 |
| VAG4      | 19,55 | 19,54     | 2,27E+11   | 17              |
|           | 19,53 |           |            |                 |
| VAG5      | 18,49 | 18,52     | 4,87E+11   | 17,5            |
|           | 18,55 |           |            |                 |
| VAG6      | 19,82 | 19,72     | 1,98E+11   | 7               |
|           | 19,62 |           |            |                 |
| VAG7      | 18,81 | 18,84     | 3,83E+11   | 8,5             |
|           | 18,87 |           |            |                 |
| VAG8      | 18,31 | 18,38     | 5,41E+11   | 36,5            |
|           | 18,45 |           |            |                 |
| VAG9      | 19,38 | 19,41     | 2,50E+11   | 34              |
|           | 19,44 |           |            |                 |
| VAG10     | 18,58 | 18,58     | 4,66E+11   | 73              |
|           | 18,58 |           |            |                 |
| VAG11     | 14,8  | 14,8      | 7,90E+12   | 1,1             |
|           | 14,8  |           |            |                 |
| VAG12     | 18,44 | 18,475    | 5,04E+11   | 14,5            |
|           | 18,51 |           |            |                 |
| VAG13     | 18,91 | 18,72     | 4,19E+11   | 12              |
|           | 18,53 |           |            |                 |
| VAG14     | 18,36 | 18,385    | 5,39E+11   | 25              |
|           | 18,41 |           |            |                 |
| VAG15     | 15,7  | 15,88     | 3,52E+12   | 6               |
|           | 16,06 |           |            |                 |
| VAG16     | 15,9  | 15,965    | 3,30E+12   | 16              |
|           | 16,03 |           |            |                 |
| VAG17     | 14,56 | 14,56     | 9,46E+12   | 1,2             |
|           | 14,56 |           |            |                 |
| VAG18     | 17,22 | 17,185    | 1,32E+12   | 6               |
|           | 17,15 |           |            |                 |
| VAG19     | 17,36 | 17,38     | 1,14E+12   | 18,5            |
|           | 17,4  |           |            |                 |
| VAG20     | 20,24 | 20,12     | 1,47E+11   | 29              |
|           | 20    |           |            |                 |
| VAG21     | 17,24 | 17,205    | 1,30E+12   | 8               |
|           | 17,17 |           |            |                 |
| VAG22     | 19,44 | 19,395    | 2,53E+11   | 37              |
|           | 19,35 |           |            |                 |
| VAG23     | 19,05 | 19,05     | 3,28E+11   | 28              |
|           | 19,11 |           |            |                 |

| Sample ID | Ct    | Ct (mean) | 16S Copies | ng/uL total DNA |
|-----------|-------|-----------|------------|-----------------|
| SEM1      | 27,08 | 27,385    | 5,44E+08   | 8,4             |
|           | 27,69 |           |            |                 |
| SEM2      | 30,56 | 30,535    | 5,01E+07   | 6,8             |
|           | 30,51 |           |            |                 |
| SEM3      | 31,44 | 32,105    | 1,53E+07   | 1               |
|           | 32,77 |           |            |                 |
| SEM4      | 29,32 | 29,395    | 1,19E+08   | 4,7             |
|           | 29,47 |           |            |                 |
| SEM5      | 30,42 | 30,325    | 5,87E+07   | 0,8             |
|           | 30,23 |           |            |                 |
| SEM6      | 32,31 | 32,62     | 1,03E+07   | 7               |
|           | 32,93 |           |            |                 |
| SEM7      | 27,66 | 27,725    | 4,21E+08   | 1               |
|           | 27,79 |           |            |                 |
| SEM8      | 32,31 | 32,27     | 1,35E+07   | 7               |
|           | 32,23 |           |            |                 |
| SEM9      | 25,07 | 24,95     | 3,44E+09   | 5,2             |
|           | 24,83 |           |            |                 |
| SEM10     | 28,37 | 28,37     | 2,58E+08   | 32              |
|           | 28,37 |           |            |                 |
| SEM11     | 31,12 | 31,28     | 2,85E+07   | 15              |
|           | 31,44 |           |            |                 |
| SEM12     | 31,24 | 30,85     | 3,95E+07   | 0,8             |
|           | 30,46 |           |            |                 |
| SEM13     | 24,06 | 24,075    | 6,67E+09   | 4,3             |
|           | 24,09 |           |            |                 |
| SEM14     | 26,68 | 26,57     | 1,01E+09   | 21              |
|           | 26,46 |           |            |                 |
| SEM15     | 32,11 | 32,005    | 1,65E+07   | 6,5             |
|           | 31,9  |           |            |                 |
| SEM16     | 24,15 | 24,115    | 6,47E+09   | 23              |
|           | 24,08 |           |            |                 |
| SEM17     | 27,29 | 27,29     | 5,85E+08   | 0,5             |
|           | 27,29 |           |            |                 |
| SEM18     | 23,37 | 23,285    | 1,21E+10   | 8,4             |
|           | 23,2  |           |            |                 |
| SEM19     | 34,01 | 33,72     | 4,49E+06   | 7,8             |
|           | 33,43 |           |            |                 |
| SEM20     | 28,94 | 28,66     | 2,07E+08   | 5,7             |
|           | 28,38 |           |            |                 |
| SEM21     | 21,25 | 21,175    | 6,00E+10   | 1               |
|           | 21,1  |           |            |                 |
| SEM22     | 21,32 | 21,22     | 5,80E+10   | 33              |
|           | 21,12 |           |            |                 |
| SEM23     | 26,45 | 26,38     | 1,10E+09   | 11,1            |
|           | 26,31 |           |            |                 |

| Sample ID    | Ct    | Ct (mean) | 16S Copies |
|--------------|-------|-----------|------------|
| STANDARD (1) | 32,9  | 32,9      | 6,81E+06   |
|              | 32,98 |           |            |
| STANDARD (2) | 31,03 | 30,91     | 6,81E+07   |
|              | 30,79 |           |            |
| STANDARD (3) | 27,62 | 27,53     | 6,81E+08   |
|              | 27,44 |           |            |
| STANDARD (4) | 23,87 | 24,015    | 6,81E+09   |
|              | 24,16 |           |            |
| STANDARD (5) | 21,2  | 21,2      | 6,81E+10   |
|              | 21,2  |           |            |
| STANDARD (6) | 17,86 | 17,95     | 6,81E+11   |
|              | 18,04 |           |            |

**Table S2.** Characteristics of male controls.

| <b>Male controls (n = 16)</b>                  | <b>Mean</b> | <b>SD</b> |
|------------------------------------------------|-------------|-----------|
| <b>Age (y)</b>                                 | 41,44       | 8,68      |
| <b>Semen Volume (mL)</b>                       | 2,48        | 1,67      |
| <b>Semen pH</b>                                | 7,93        | 0,28      |
| <b>Sperm concentration (10<sup>6</sup>/mL)</b> | 82,08       | 34,94     |
| <b>Motility grade a (%)</b>                    | 35,92       | 16,63     |
| <b>Motility grade b (%)</b>                    | 18,23       | 9,61      |
| <b>Motility grade c (%)</b>                    | 8,13        | 9,68      |
| <b>Motility grade d (%)</b>                    | 38,93       | 12,73     |
| <b>Morphology (% normal)</b>                   | 4,53        | 2,07      |
| <b>Vitality (% alive)</b>                      | 80,00       | 8,10      |

**Table S3.** Relative abundance of species found in the vaginal microbiota of 23 women with idiopathic infertility.

| Sample ID | <i>L. crispatus</i> | <i>L. iners</i> | <i>L. gasseri</i> | <i>L. psittaci</i> | <i>L. hominis</i> | <i>L. acidophilus</i> | <i>L. ultunensis</i> | <i>L. jensenii</i> | Total <i>Lactobacillus</i> spp. | <i>Bifidobacterium breve</i> | <i>Gardnerella vaginalis</i> | <i>Bifidobacterium minimum</i> | Total Bifidobacteriaceae |
|-----------|---------------------|-----------------|-------------------|--------------------|-------------------|-----------------------|----------------------|--------------------|---------------------------------|------------------------------|------------------------------|--------------------------------|--------------------------|
| VAG.19    | 8%                  | 2%              | 4%                | 0%                 | 2%                | 1%                    | 12%                  | 0%                 | 29,7%                           | 0%                           | 39%                          | 3%                             | 42%                      |
| VAG.6     | 0%                  | 0%              | 1%                | 0%                 | 0%                | 0%                    | 0%                   | 0%                 | 1,4%                            | 93%                          | 0%                           | 0%                             | 93%                      |
| VAG.22    | 13%                 | 47%             | 0%                | 12%                | 0%                | 15%                   | 0%                   | 11%                | 98,8%                           | 0%                           | 0%                           | 0%                             | 0%                       |
| VAG.4     | 31%                 | 2%              | 0%                | 1%                 | 0%                | 29%                   | 0%                   | 34%                | 97,3%                           | 0%                           | 0%                           | 0%                             | 0%                       |
| VAG.10    | 8%                  | 4%              | 55%               | 0%                 | 6%                | 0%                    | 0%                   | 1%                 | 73,1%                           | 0%                           | 17%                          | 0%                             | 17%                      |
| VAG.3     | 13%                 | 6%              | 68%               | 0%                 | 8%                | 0%                    | 0%                   | 0%                 | 95,3%                           | 3%                           | 0%                           | 0%                             | 3%                       |
| VAG.13    | 8%                  | 81%             | 7%                | 1%                 | 3%                | 0%                    | 0%                   | 0%                 | 99,3%                           | 0%                           | 0%                           | 0%                             | 0%                       |
| VAG.9     | 17%                 | 77%             | 6%                | 0%                 | 0%                | 0%                    | 0%                   | 0%                 | 99,9%                           | 0%                           | 0%                           | 0%                             | 0%                       |
| VAG.21    | 22%                 | 76%             | 0%                | 1%                 | 0%                | 0%                    | 1%                   | 0%                 | 99,9%                           | 0%                           | 0%                           | 0%                             | 0%                       |
| VAG.11    | 19%                 | 80%             | 0%                | 0%                 | 0%                | 1%                    | 0%                   | 0%                 | 100,0%                          | 0%                           | 0%                           | 0%                             | 0%                       |
| VAG.8     | 2%                  | 92%             | 3%                | 0%                 | 3%                | 0%                    | 0%                   | 0%                 | 98,8%                           | 0%                           | 0%                           | 0%                             | 0%                       |
| VAG.18    | 66%                 | 24%             | 5%                | 3%                 | 1%                | 1%                    | 0%                   | 0%                 | 99,9%                           | 0%                           | 0%                           | 0%                             | 0%                       |
| VAG.15    | 62%                 | 28%             | 5%                | 1%                 | 1%                | 1%                    | 0%                   | 2%                 | 100,0%                          | 0%                           | 0%                           | 0%                             | 0%                       |
| VAG.20    | 50%                 | 35%             | 6%                | 0%                 | 2%                | 4%                    | 0%                   | 3%                 | 99,8%                           | 0%                           | 0%                           | 0%                             | 0%                       |
| VAG.17    | 42%                 | 53%             | 2%                | 3%                 | 0%                | 0%                    | 0%                   | 0%                 | 99,6%                           | 0%                           | 0%                           | 0%                             | 0%                       |
| VAG.12    | 79%                 | 4%              | 4%                | 0%                 | 3%                | 7%                    | 0%                   | 3%                 | 100,0%                          | 0%                           | 0%                           | 0%                             | 0%                       |
| VAG.1     | 82%                 | 5%              | 3%                | 3%                 | 5%                | 2%                    | 0%                   | 0%                 | 99,6%                           | 0%                           | 0%                           | 0%                             | 0%                       |
| VAG.23    | 80%                 | 12%             | 0%                | 3%                 | 0%                | 4%                    | 0%                   | 1%                 | 99,5%                           | 0%                           | 0%                           | 0%                             | 0%                       |
| VAG.14    | 91%                 | 4%              | 0%                | 2%                 | 1%                | 2%                    | 0%                   | 0%                 | 99,9%                           | 0%                           | 0%                           | 0%                             | 0%                       |
| VAG.5     | 91%                 | 5%              | 0%                | 0%                 | 0%                | 3%                    | 0%                   | 1%                 | 100,0%                          | 0%                           | 0%                           | 0%                             | 0%                       |
| VAG.7     | 91%                 | 5%              | 1%                | 1%                 | 1%                | 0%                    | 0%                   | 1%                 | 99,7%                           | 0%                           | 0%                           | 0%                             | 0%                       |
| VAG.2     | 90%                 | 7%              | 1%                | 1%                 | 0%                | 0%                    | 0%                   | 1%                 | 100,0%                          | 0%                           | 0%                           | 0%                             | 0%                       |
| VAG.16    | 87%                 | 7%              | 1%                | 3%                 | 1%                | 1%                    | 0%                   | 0%                 | 99,8%                           | 0%                           | 0%                           | 0%                             | 0%                       |



**Table S4.** Relative abundance values of *Lactobacillus* species, shown as mean (M) and standard error of the mean (SEM) for the two groups of women. P-values were calculated by permutation analysis and subsequently corrected for multiple comparisons with false discovery rate (FDR).

| <i>Lactobacillus</i> spp. | IUI SUCCESS ♀ |        | NO IUI SUCCESS ♀ |        | p-value            | p-value adj.  |
|---------------------------|---------------|--------|------------------|--------|--------------------|---------------|
|                           | M             | SEM    | M                | SEM    |                    |               |
| <i>L. crispatus</i>       | 0,9000        | 0,0036 | 0,3311           | 0,0612 | <b>&lt; 0,0001</b> | <b>0,0002</b> |
| <i>L. iners</i>           | 0,0560        | 0,0028 | 0,3430           | 0,0696 | 0,0760             | 0,3042        |
| <i>L. gasseri</i>         | 0,0060        | 0,0011 | 0,0938           | 0,0399 | 0,2245             | 0,4538        |
| <i>L. psittaci</i>        | 0,0140        | 0,0024 | 0,0100           | 0,0025 | 0,5115             | 0,7522        |
| <i>L. hominis</i>         | 0,0060        | 0,0011 | 0,0199           | 0,0051 | 0,2269             | 0,4538        |
| <i>L. acidophilus</i>     | 0,0120        | 0,0027 | 0,0282           | 0,0144 | 0,6581             | 0,7522        |
| <i>L. ultunensis</i>      | 0,0000        | 0,0000 | 0,0074           | 0,0060 | 0,8221             | 0,8221        |
| <i>L. jenseni</i>         | 0,0060        | 0,0011 | 0,0260           | 0,0167 | 0,5711             | 0,7522        |

**Table S5.** Relative abundance values of *Lactobacillus* species, shown as mean (M) and standard error of the mean (SEM) for the two groups of men. P-values were calculated by permutation analysis and subsequently corrected for multiple comparisons with false discovery rate (FDR).

| <i>Lactobacillus</i> spp. | NO IUI SUCCESS ♂ |        | IUI SUCCESS ♂ |        | p-value | p-value adj. |
|---------------------------|------------------|--------|---------------|--------|---------|--------------|
|                           | M                | SEM    | M             | SEM    |         |              |
| <i>L. crispatus</i>       | 0,0400           | 0,0207 | 0,0584        | 0,0241 | 0,7777  | 0,9332       |
| <i>L. iners</i>           | 0,0555           | 0,0224 | 0,0537        | 0,0163 | 0,9884  | 1,0000       |
| <i>L. gasseri</i>         | 0,0004           | 0,0004 | 0             | 0      | 0,2174  | 0,4307       |
| <i>L. psittaci</i>        | 0,0024           | 0,0013 | 0,0043        | 0,0020 | 0,7408  | 0,9332       |
| <i>L. hominis</i>         | 0,0005           | 0,0005 | 0             | 0      | 0,2174  | 0,4307       |
| <i>L. acidophilus</i>     | 0,0019           | 0,0010 | 0,0014        | 0,0007 | 0,7696  | 0,9332       |
| <i>L. jensenii</i>        | 0,0059           | 0,0031 | 0             | 0      | 0,2513  | 0,4307       |
| <i>L. fornicalis</i>      | 0,0023           | 0,0015 | 0             | 0      | 0,2174  | 0,4307       |
| <i>L. paracasei</i>       | 0,0037           | 0,0033 | 0             | 0      | 0,2174  | 0,4307       |
| <i>L. fermentum</i>       | 0,0019           | 0,0017 | 0             | 0      | 0,2174  | 0,4307       |
| <i>L. delbruecki</i>      | 0,0005           | 0,0005 | 0,0014        | 0,0007 | 1,0000  | 1,0000       |
| <i>L. hamsteri</i>        | 0                | 0      | 0,0014        | 0,0007 | 0,2174  | 0,4307       |
